# Supplementary material
Source: PubMed Central journal article supplement (PMC539762)
Supplement: pnas_101_52_17908__1.pdf [file pnas_101_52_17908__1.pdf]

## 1. The QM/MM Scheme

The QM/MM force-field is defined by the following Hamiltonian:

$$\hat{H} = \hat{H}_{\text{QM}} + \hat{H}_{\text{MM}} + \sum_{i=1}^n \sum_{j=1}^Q -\frac{q_j}{r_{ij}} + \sum_{i=1}^N \sum_{j=1}^Q \frac{Z_i q_i}{r_{ij}} + E_{\text{vdW}} + E_{\text{bonded}}$$

where  $\hat{H}_{\text{QM}}$  describes the QM segment in the vacuum,  $\hat{H}_{\text{MM}}$  represents the MM segment and the remaining terms describe the interactions between the QM and MM segments. These include:

- (i) the electrostatic interaction of QM electrons and nuclei with the MM point charges ( $q_j$ ),
- (ii) the short-range van der Waals interactions ( $E_{\text{vdW}}$ ) and
- (iii) additional parametrized potentials ( $E_{\text{bonded}}$ ) required to correctly describe the QM/MM frontier geometry (see Scheme 2).

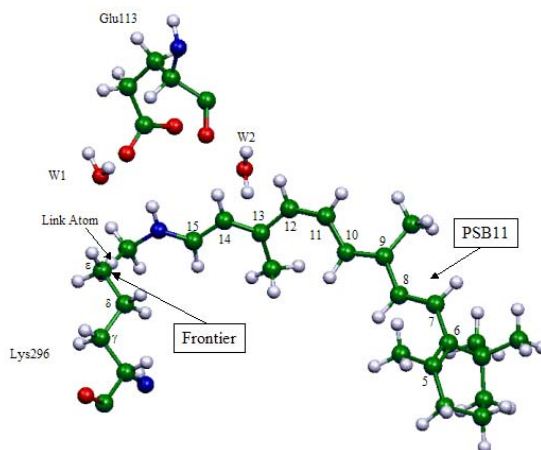

Scheme 2.

Notice that the QM wavefunction is polarized by the MM point charges. In contrast, the MM point charges remain constant during the calculation. On the other hand, the charges of the chosen Amber96 force-field (1) take into account the polarization effect in a mean-field way.

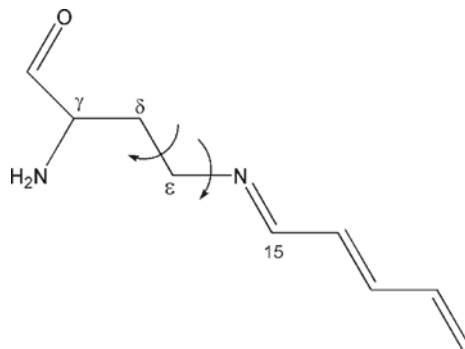

Scheme 3.

The QM/MM frontier is set at the C<sub>ε</sub>-C<sub>δ</sub> bond of the Lys-296 side-chain (see Schemes 2 and 3). This choice ensures a QM segment (comprising the retinal model and the last bond of the Lys-296 side-chain) of a moderate size and far enough from the QM segment “reactive part” (i.e. the π-backbone). The simplest and more widely used hydrogen link atom (HLA) scheme is used to cap the pending valence on the QM C<sub>ε</sub> atom. The link hydrogen atom is fixed at 1 Å from C<sub>ε</sub> and kept along the C<sub>ε</sub>-C<sub>δ</sub> axis.

As documented elsewhere (2), to correctly describe the frontier the HLA may interact with all the MM point charges, but cannot be involved in other MM potentials. Few MM potentials involving the frontier atoms have been reparameterized. First, the values of the point charges residing on the Lys-296 atoms have been changed to reflect its QM/MM status. In fact, in Amber96 any aminoacid residue has a net charge. The lysine residue has a net charge of +1 (i.e. protonated lysine). In our QM/MM framework, the MM part of Lys-296 residue must have a null charge and this requires changes in the MM point charges of this residue (Table 2).

Table 2. The values of the reparameterized QM/MM point charges for Lys-296.

|        |                |                |                       |                |                       |                |
|--------|----------------|----------------|-----------------------|----------------|-----------------------|----------------|
| Atom   | N              | C <sub>α</sub> | C <sub>carbonyl</sub> | H <sub>N</sub> | O <sub>carbonyl</sub> | H <sub>α</sub> |
| Charge | -0.3981        | -0.2400        | 0.6840                | 0.2246         | -0.6396               | 0.1426         |
| Atom   | C <sub>β</sub> | H <sub>β</sub> | C <sub>γ</sub>        | H <sub>γ</sub> | C <sub>δ</sub>        | H <sub>δ</sub> |
| Charge | -0.0094        | 0.0362         | 0.0187                | 0.0103         | 0.0000                | 0.0621         |

The charge of the frontier MM carbon atom C<sub>δ</sub> is set to 0 to ensure that the QM wavefunction is not overpolarized by the close HLA. This procedure is allowed by the little value of the original Amber96 point charge and makes possible the use of the standard MM bonded potentials (stretching, bending, etc.) for the description of the geometry of the frontier. Second, the van der Waals atomic parameters for retinal (i.e. for a conjugated hydrocarbon chain containing sp<sup>2</sup> carbon atoms) are not defined in the Amber96 force-field. Similarly, the C<sub>15</sub>-N-C<sub>ε</sub>-C<sub>δ</sub> torsion potential does not exist in Amber96.

These missing parameters have been determined in such a way to reproduce the ground state (S<sub>0</sub>) and first excited state (S<sub>1</sub>) CASSCF torsional energy profiles relative to the N-C<sub>ε</sub>-C<sub>δ</sub>-C<sub>γ</sub> and C<sub>15</sub>-N-C<sub>ε</sub>-C<sub>δ</sub> dihedral angles of the model system given in Scheme 3 (3). The resulting van der Waals parameters are (R\*=1.87 Å, ε=0.0860 kcal·mol<sup>-1</sup>) for an sp<sup>2</sup> carbon atom of the retinal π-system, (R\*=1.87 Å, ε=0.1094 kcal·mol<sup>-1</sup>) for a sp<sup>3</sup> carbon atom of retinal (i.e. the methyl substituents in position 9 and 12 in Scheme 2) and (R\*=0.92 Å, ε=0.0157 kcal·mol<sup>-1</sup>) for the hydrogen atom of retinal. The C<sub>15</sub>-N-C<sub>ε</sub>-C<sub>δ</sub> torsion potential is given by: 0.750 [1 + cos(φ - 0)].

## 2. The Protein Model

The recent refinement (4) at 2.8 Å of the bovine rhodopsin crystal structure (1HZX in the Protein Data Bank archive) was used as a basis to build our Rh model. In particular, we selected the higher resolution monomer A. In this monomer some residues located far from the retinal chromophore region are missing (236-240 and 331-333). Since we are interested in a correct description of the retinal region only we

did not try to add these residues. For the same reason, the ionization status of the potentially charged carboxylic residues of the protein has been defined with a simple choice: since the majority of the carboxylic residues are located in the region near the cytoplasmic side these are deprotonated (i.e. negatively charged) whenever a counterion is found in its vicinity. If not, we assume a protonated (i.e. neutral) state. The same strategy is used for the residues in the extracellular region.

Close to the retinal, there are few potentially charged ionic residues such as Glu-113 (i.e. the retinal PSB counterion), Asp-83 and Glu-181. While Glu-113 is defined as deprotonated and forming a salt bridge with the protonated Schiff base (5), the Asp-83 and Glu-181 residues are kept neutral since no counterion can be identified in their vicinity. Indeed, experimental evidence (6) has been reported that indicates that these residues are both protonated (i.e. neutral). In the retinal region the Glu-122 residues could have His-211 as counterion, thus leading to an ion-pair. However, Fourier Transform IR (FTIR) experiments suggest that Glu-122 is protonated. Accordingly, His-211 and Glu-122 have been taken as protonated (i.e. neutral) in our model. Finally, all histidine residues have been defined as protonated residues with the only exception of His-195 that is in close contact with Glu-197.

Two water molecules have been introduced in the model. The first one, already present in the crystal structure, is located between the retinal and Glu-181 (W2 in Scheme 2). The second one (W1) has been placed between the retinal protonated Schiff base and its counterion Glu-113, as suggested by Kandori *et al.* (7). The other hetero atoms appearing in the crystal structure have been omitted because they are not in direct interaction with retinal. To get a globally neutral model, a chloride ion has been set close to Arg-147.

### 3. PSB11 in Explicit Solution

We have placed the PSB11 chromophore in a rectangular box of methanol molecules. The geometry of the solution was constructed by placing methanol molecules within 10 Å from any given atom of the chromophore by using the xleap module of the AMBER package (8); this procedure has generated 385 methanol molecules. To neutralize the system we added a chlorium ion. The resulting system consisted of 2365 atoms.

### 4. Optimized Structures

Shown are cartesian coordinates (Å) for the following optimized structures (optimized fragments only).

**S<sub>0</sub>-Rh.** Optimized at the CASSCF/6-31G\*/Amber level of theory with the active space comprising 12 electrons/12 orbitals. The atoms in bold indicate atoms that have been kept frozen during optimization procedure. Atom HLA denotes the hydrogen link atom.

| Atom     | X        | Y        | Z         | Charge  |
|----------|----------|----------|-----------|---------|
| <b>N</b> | 1.115000 | 6.262998 | -5.370998 | -.51630 |

|   |           |           |           |         |
|---|-----------|-----------|-----------|---------|
| C | .802000   | 5.175998  | -4.439998 | .03970  |
| C | 1.938999  | 4.160999  | -4.360998 | .53660  |
| O | 2.402999  | 3.833999  | -3.271999 | -.58190 |
| H | .490880   | 6.403988  | -6.155218 | .29360  |
| H | .662240   | 5.589198  | -3.441299 | .11050  |
| C | -.489000  | 4.469998  | -4.870998 | .05600  |
| C | -1.315000 | 3.909999  | -3.724999 | .01360  |
| C | -.537000  | 2.944999  | -2.848999 | .80540  |
| O | .016000   | 1.955999  | -3.390999 | -.81880 |
| O | -.486999  | 3.177999  | -1.613999 | -.81880 |
| H | -.314450  | 3.720259  | -5.641098 | -.01730 |
| H | -1.159730 | 5.222768  | -5.250978 | -.01730 |
| H | -2.210399 | 3.425999  | -4.109319 | -.04250 |
| H | -1.646269 | 4.758728  | -3.123839 | -.04250 |
| N | 1.944999  | -1.515999 | 4.989998  | -.39805 |
| C | 1.830999  | -.073000  | 5.100998  | -.24000 |
| C | 1.949999  | .463000   | 6.510998  | .68395  |
| O | 1.821999  | 1.661999  | 6.712998  | -.63955 |
| H | 1.163730  | -2.051989 | 4.638878  | .22455  |
| H | 2.644289  | .388350   | 4.539988  | .14260  |
| C | .562184   | .471593   | 4.412214  | -.00940 |
| C | .647395   | .228339   | 2.905479  | .01870  |
| C | -.679201  | .455348   | 2.174548  | .00000  |
| C | -.708968  | -.461944  | .943648   |         |
| N | .291210   | -.059143  | -.057086  |         |
| H | .470702   | 1.539804  | 4.566224  | .03620  |
| H | -.334259  | .047233   | 4.842267  | .03620  |
| H | .959465   | -.797585  | 2.745855  | .01030  |
| H | 1.413660  | .875469   | 2.475668  | .01030  |
| H | -.787766  | 1.507093  | 1.895066  | .06210  |
| H | -1.513575 | .182041   | 2.825106  | .06210  |
| H | -1.683488 | -.416855  | .485487   |         |
| H | -.483060  | -1.472114 | 1.241346  |         |
| H | .072029   | .761400   | -.609640  |         |
| C | 1.350744  | -.740551  | -.312793  |         |
| C | 2.261938  | -.426553  | -1.383077 |         |
| C | 3.409522  | -1.137401 | -1.614307 |         |
| C | 4.226937  | -.717263  | -2.758500 |         |
| C | 5.501593  | -1.060244 | -3.082862 |         |
| C | 6.488897  | -1.815909 | -2.311867 |         |
| C | 7.644302  | -2.341877 | -2.801413 |         |
| C | 8.620835  | -2.867257 | -1.833984 |         |
| C | 9.884947  | -3.253504 | -2.108414 |         |
| C | 10.867027 | -3.698740 | -1.077738 |         |
| C | 3.817233  | -2.327584 | -.768648  |         |
| C | 7.991565  | -2.385426 | -4.269794 |         |
| H | 1.507712  | -1.588868 | .327671   |         |
| H | 2.022008  | .432939   | -1.991398 |         |
| H | 3.735651  | -.035300  | -3.432174 |         |
| H | 5.869230  | -.620176  | -3.991390 |         |
| H | 6.352824  | -1.861952 | -1.248001 |         |
| H | 8.298926  | -2.874170 | -.805891  |         |
| H | 10.218396 | -3.280674 | -3.132515 |         |
| H | 4.511171  | -2.023172 | .006920   |         |
| H | 2.980531  | -2.807926 | -.280945  |         |
| H | 4.303004  | -3.078338 | -1.373993 |         |
| H | 8.848604  | -1.758557 | -4.486209 |         |
| H | 8.238350  | -3.398579 | -4.572195 |         |
| H | 7.179480  | -2.037786 | -4.893307 |         |
| C | 11.168708 | -2.940210 | .005408   |         |
| C | 12.112710 | -3.411058 | 1.095387  |         |

|     |           |           |           |         |
|-----|-----------|-----------|-----------|---------|
| C   | 10.572190 | -1.576746 | .294799   |         |
| C   | 12.971140 | -4.610722 | .707356   |         |
| H   | 12.754464 | -2.584176 | 1.388436  |         |
| H   | 11.507147 | -3.645675 | 1.971969  |         |
| C   | 12.123882 | -5.631464 | -.039153  |         |
| H   | 13.812886 | -4.290319 | .102836   |         |
| H   | 13.385472 | -5.060778 | 1.607585  |         |
| C   | 11.532018 | -5.065845 | -1.341825 |         |
| H   | 12.707358 | -6.517567 | -.273729  |         |
| H   | 11.309031 | -5.957637 | .606632   |         |
| C   | 12.644310 | -4.909884 | -2.396356 |         |
| C   | 10.494740 | -6.077888 | -1.863311 |         |
| H   | 12.251256 | -4.497879 | -3.322959 |         |
| H   | 13.453490 | -4.276500 | -2.051512 |         |
| H   | 13.071030 | -5.881054 | -2.633373 |         |
| H   | 10.107298 | -5.805704 | -2.839668 |         |
| H   | 10.950892 | -7.058984 | -1.956257 |         |
| H   | 9.652096  | -6.164023 | -1.181586 |         |
| H   | 11.346294 | -.915013  | .677607   |         |
| H   | 10.125919 | -1.105259 | -.569708  |         |
| H   | 9.808473  | -1.647207 | 1.066035  |         |
| O   | 1.037522  | -2.104677 | -3.633396 | -.83400 |
| H   | 1.653329  | -2.006463 | -2.886779 | .41700  |
| H   | 1.253322  | -1.269512 | -4.093395 | .41700  |
| O   | -2.065384 | 1.322998  | -.787389  | -.83400 |
| H   | -1.490912 | 2.093161  | -1.054265 | .41700  |
| H   | -2.842395 | 1.491924  | -1.341554 | .41700  |
| HLA | -.685062  | .138693   | 1.742812  |         |

**S<sub>1</sub>-Rh.** Optimized at the CASSCF/6-31G\*/Amber level of theory with the active space comprising 12 electrons/12 orbitals. The atoms in bold indicate atoms that have been kept frozen during optimization procedure. Atom HLA denotes the hydrogen link atom.

| Atom     | X         | Y         | Z         | Charge  |
|----------|-----------|-----------|-----------|---------|
| <b>N</b> | 1.115000  | 6.262998  | -5.370998 | -.51630 |
| <b>C</b> | .802000   | 5.175998  | -4.439998 | .03970  |
| <b>C</b> | 1.938999  | 4.160999  | -4.360998 | .53660  |
| <b>O</b> | 2.402999  | 3.833999  | -3.271999 | -.58190 |
| <b>H</b> | .490880   | 6.403988  | -6.155218 | .29360  |
| <b>H</b> | .662240   | 5.589198  | -3.441299 | .11050  |
| <b>C</b> | -.489000  | 4.469998  | -4.870998 | .05600  |
| <b>C</b> | -1.315000 | 3.909999  | -3.724999 | .01360  |
| <b>C</b> | -.537000  | 2.944999  | -2.848999 | .80540  |
| <b>O</b> | .016000   | 1.955999  | -3.390999 | -.81880 |
| <b>O</b> | -.486999  | 3.177999  | -1.613999 | -.81880 |
| <b>H</b> | -.314450  | 3.720259  | -5.641098 | -.01730 |
| <b>H</b> | -1.159730 | 5.222768  | -5.250978 | -.01730 |
| <b>H</b> | -2.210399 | 3.425999  | -4.109319 | -.04250 |
| <b>H</b> | -1.646269 | 4.758728  | -3.123839 | -.04250 |
| <b>N</b> | 1.944999  | -1.515999 | 4.989998  | -.39805 |
| <b>C</b> | 1.830999  | -.073000  | 5.100998  | -.24000 |
| <b>C</b> | 1.949999  | .463000   | 6.510998  | .68395  |
| <b>O</b> | 1.821999  | 1.661999  | 6.712998  | -.63955 |
| <b>H</b> | 1.163730  | -2.051989 | 4.638878  | .22455  |
| <b>H</b> | 2.644289  | .388350   | 4.539988  | .14260  |
| C        | .560260   | .469759   | 4.413709  | -.00940 |
| C        | .637439   | .215498   | 2.908273  | .01870  |
| C        | -.697008  | .430800   | 2.187310  | .00000  |

|   |           |           |           |         |
|---|-----------|-----------|-----------|---------|
| C | -.729704  | -.476793  | .951634   |         |
| N | .262429   | -.075353  | -.037043  |         |
| H | .472075   | 1.539069  | 4.560412  | .03620  |
| H | -.335567  | .049777   | 4.850037  | .03620  |
| H | .954448   | -.808894  | 2.750545  | .01030  |
| H | 1.396703  | .864205   | 2.468480  | .01030  |
| H | -.814063  | 1.481916  | 1.910411  | .06210  |
| H | -1.525561 | .151645   | 2.841774  | .06210  |
| H | -1.708358 | -.428549  | .501950   |         |
| H | -.499820  | -1.486916 | 1.245199  |         |
| H | .050758   | .731629   | -.591373  |         |
| C | 1.346265  | -.786671  | -.316893  |         |
| C | 2.201289  | -.496446  | -1.354148 |         |
| C | 3.436832  | -1.243574 | -1.646306 |         |
| C | 4.183089  | -.821224  | -2.698347 |         |
| C | 5.513090  | -1.297182 | -3.137986 |         |
| C | 6.449705  | -1.945409 | -2.395006 |         |
| C | 7.764865  | -2.377237 | -2.857023 |         |
| C | 8.668109  | -2.788308 | -1.879412 |         |
| C | 9.952191  | -3.308960 | -2.119105 |         |
| C | 10.891498 | -3.740309 | -1.089246 |         |
| C | 3.783707  | -2.432753 | -.776678  |         |
| C | 8.111174  | -2.412224 | -4.325265 |         |
| H | 1.503488  | -1.616883 | .339327   |         |
| H | 1.985683  | .376588   | -1.947214 |         |
| H | 3.783065  | -.019873  | -3.291442 |         |
| H | 5.770727  | -.995035  | -4.137993 |         |
| H | 6.263021  | -2.103383 | -1.351424 |         |
| H | 8.337169  | -2.726931 | -.857399  |         |
| H | 10.234086 | -3.508421 | -3.140445 |         |
| H | 4.386271  | -2.133163 | .074702   |         |
| H | 2.897369  | -2.913541 | -.385959  |         |
| H | 4.327842  | -3.183614 | -1.327952 |         |
| H | 8.884917  | -1.691651 | -4.563961 |         |
| H | 8.464164  | -3.396096 | -4.616404 |         |
| H | 7.256970  | -2.176460 | -4.943598 |         |
| C | 11.122394 | -3.014206 | .049227   |         |
| C | 12.061427 | -3.492306 | 1.137992  |         |
| C | 10.484659 | -1.677325 | .374125   |         |
| C | 12.977331 | -4.641434 | .728619   |         |
| H | 12.660356 | -2.650354 | 1.475569  |         |
| H | 11.447127 | -3.781913 | 1.992241  |         |
| C | 12.192239 | -5.660485 | -.083655  |         |
| H | 13.825417 | -4.268815 | .163943   |         |
| H | 13.379194 | -5.111249 | 1.623559  |         |
| C | 11.626671 | -5.068168 | -1.385640 |         |
| H | 12.808634 | -6.520455 | -.327598  |         |
| H | 11.367543 | -6.035551 | .522196   |         |
| C | 12.766602 | -4.835871 | -2.394214 |         |
| C | 10.650254 | -6.105955 | -1.975486 |         |
| H | 12.392157 | -4.401687 | -3.318956 |         |
| H | 13.548952 | -4.195710 | -2.001861 |         |
| H | 13.229436 | -5.784412 | -2.651354 |         |
| H | 10.285641 | -5.826561 | -2.958925 |         |
| H | 11.152105 | -7.062775 | -2.080037 |         |
| H | 9.789834  | -6.254489 | -1.327210 |         |
| H | 11.233085 | -1.023586 | .814888   |         |
| H | 10.066065 | -1.166080 | -.481435  |         |
| H | 9.695320  | -1.795801 | 1.114004  |         |
| O | 1.040996  | -2.126382 | -3.657277 | -.83400 |
| H | 1.525976  | -2.035244 | -2.817460 | .41700  |

|     |           |           |           |         |
|-----|-----------|-----------|-----------|---------|
| H   | 1.338649  | -1.287133 | -4.062139 | .41700  |
| O   | -2.079398 | 1.326166  | -.787390  | -.83400 |
| H   | -1.467536 | 2.069761  | -1.044687 | .41700  |
| H   | -2.827350 | 1.505178  | -1.373341 | .41700  |
| HLA | -.703744  | .118129   | 1.754996  |         |

**S<sub>1</sub>-Rh<sub>stretch</sub>**. Optimized at the CASSCF/6-31G\*/Amber level of theory with the active space comprising 12 electrons/12 orbitals. The atoms in bold indicate atoms that have been kept frozen during optimization procedure. Atom HLA denotes the hydrogen link atom.

| Atom     | X         | Y         | Z         | Charge  |
|----------|-----------|-----------|-----------|---------|
| <b>N</b> | 1.115000  | 6.263000  | -5.371000 | -.51630 |
| <b>C</b> | .802000   | 5.176000  | -4.440000 | .03970  |
| <b>C</b> | 1.939000  | 4.161000  | -4.361000 | .53660  |
| <b>O</b> | 2.403000  | 3.834000  | -3.272000 | -.58190 |
| <b>H</b> | .490880   | 6.403990  | -6.155220 | .29360  |
| <b>H</b> | .662240   | 5.589200  | -3.441300 | .11050  |
| <b>C</b> | -.489000  | 4.470000  | -4.871000 | .05600  |
| <b>C</b> | -1.315000 | 3.910000  | -3.725000 | .01360  |
| <b>C</b> | -.537000  | 2.945000  | -2.849000 | .80540  |
| <b>O</b> | .016000   | 1.956000  | -3.391000 | -.81880 |
| <b>O</b> | -.487000  | 3.178000  | -1.614000 | -.81880 |
| <b>H</b> | -.314450  | 3.720260  | -5.641100 | -.01730 |
| <b>H</b> | -1.159730 | 5.222770  | -5.250980 | -.01730 |
| <b>H</b> | -2.210400 | 3.426000  | -4.109320 | -.04250 |
| <b>H</b> | -1.646270 | 4.758730  | -3.123840 | -.04250 |
| <b>N</b> | 1.945000  | -1.516000 | 4.990000  | -.39805 |
| <b>C</b> | 1.831000  | -.073000  | 5.101000  | -.24000 |
| <b>C</b> | 1.950000  | .463000   | 6.511000  | .68395  |
| <b>O</b> | 1.822000  | 1.662000  | 6.713000  | -.63955 |
| <b>H</b> | 1.163730  | -2.051990 | 4.638880  | .22455  |
| <b>H</b> | 2.644290  | .388350   | 4.539990  | .14260  |
| C        | .560590   | .467900   | 4.409570  | -.00940 |
| C        | .631370   | .218170   | 2.902820  | .01870  |
| C        | -.702510  | .441070   | 2.182360  | .00000  |
| C        | -.730630  | -.450100  | .934010   |         |
| N        | .251890   | -.034200  | -.050020  |         |
| H        | .471520   | 1.537190  | 4.556500  | .03620  |
| H        | -.335570  | .048910   | 4.845260  | .03620  |
| H        | .943970   | -.806710  | 2.740800  | .01030  |
| H        | 1.391420  | .866990   | 2.464080  | .01030  |
| H        | -.818290  | 1.495060  | 1.917910  | .06210  |
| H        | -1.532460 | .149920   | 2.828360  | .06210  |
| H        | -1.718930 | -.417050  | .500140   |         |
| H        | -.505450  | -1.464920 | 1.225650  |         |
| H        | .037000   | .775680   | -.600850  |         |
| C        | 1.355360  | -.737260  | -.309290  |         |
| C        | 2.241740  | -.434823  | -1.343889 |         |
| C        | 3.433741  | -1.175216 | -1.579281 |         |
| C        | 4.234590  | -.765634  | -2.694603 |         |
| C        | 5.551358  | -1.118942 | -3.027209 |         |
| C        | 6.509073  | -1.845487 | -2.274673 |         |
| C        | 7.705673  | -2.382326 | -2.773540 |         |
| C        | 8.647793  | -2.881821 | -1.836275 |         |
| C        | 9.934483  | -3.268282 | -2.111272 |         |
| C        | 10.896583 | -3.703291 | -1.098401 |         |
| C        | 3.839821  | -2.360346 | -.727187  |         |

|     |           |           |           |         |
|-----|-----------|-----------|-----------|---------|
| C   | 8.061096  | -2.420903 | -4.238585 |         |
| H   | 1.511577  | -1.582334 | .333376   |         |
| H   | 2.004948  | .422937   | -1.955000 |         |
| H   | 3.739298  | -.090883  | -3.372339 |         |
| H   | 5.920324  | -.677185  | -3.935732 |         |
| H   | 6.369976  | -1.889067 | -1.211217 |         |
| H   | 8.323502  | -2.890050 | -.809900  |         |
| H   | 10.267550 | -3.300678 | -3.134372 |         |
| H   | 4.488480  | -2.070590 | .095990   |         |
| H   | 2.981250  | -2.838460 | -.276630  |         |
| H   | 4.336470  | -3.121340 | -1.314820 |         |
| H   | 8.907780  | -1.775220 | -4.437320 |         |
| H   | 8.327770  | -3.431570 | -4.530110 |         |
| H   | 7.254660  | -2.084120 | -4.870110 |         |
| C   | 11.194370 | -2.941042 | -.009416  |         |
| C   | 12.129342 | -3.409226 | 1.082317  |         |
| C   | 10.592796 | -1.579261 | .278199   |         |
| C   | 12.984900 | -4.611630 | .701200   |         |
| H   | 12.763380 | -2.581770 | 1.383520  |         |
| H   | 11.503560 | -3.645310 | 1.944850  |         |
| C   | 12.136360 | -5.628570 | -.048040  |         |
| H   | 13.836610 | -4.298360 | .105790   |         |
| H   | 13.377560 | -5.061560 | 1.608520  |         |
| C   | 11.562696 | -5.074517 | -1.358820 |         |
| H   | 12.715100 | -6.517660 | -.276980  |         |
| H   | 11.309380 | -5.944350 | .585600   |         |
| C   | 12.677890 | -4.922770 | -2.408370 |         |
| C   | 10.513380 | -6.078560 | -1.876260 |         |
| H   | 12.285410 | -4.508970 | -3.334900 |         |
| H   | 13.490360 | -4.294470 | -2.060820 |         |
| H   | 13.099390 | -5.895220 | -2.646060 |         |
| H   | 10.126310 | -5.807460 | -2.854710 |         |
| H   | 10.955960 | -7.064890 | -1.967660 |         |
| H   | 9.673600  | -6.155690 | -1.190220 |         |
| H   | 11.364200 | -.915540  | .656100   |         |
| H   | 10.145040 | -1.096610 | -.580650  |         |
| H   | 9.836970  | -1.662380 | 1.056670  |         |
| O   | 1.045260  | -2.104770 | -3.634140 | -.83400 |
| H   | 1.536040  | -1.969400 | -2.800280 | .41700  |
| H   | 1.223930  | -1.228360 | -4.027340 | .41700  |
| O   | -2.117940 | 1.321130  | -.811600  | -.83400 |
| H   | -1.483650 | 2.048880  | -1.047840 | .41700  |
| H   | -2.858400 | 1.527490  | -1.397690 | .41700  |
| HLA | -.706676  | .136169   | 1.743772  |         |

**Rh-Cl<sub>90</sub>**. Optimized at the CASSCF/6-31G\*/Amber level of theory with the active space comprising 12 electrons/12 orbitals. The atoms in bold indicate atoms that have been kept frozen during optimization procedure. Atom HLA denotes the hydrogen link atom.

| Atom     | X        | Y        | Z         | Charge  |
|----------|----------|----------|-----------|---------|
| <b>N</b> | 1.115000 | 6.263000 | -5.371000 | -.51630 |
| <b>C</b> | .802000  | 5.176000 | -4.440000 | .03970  |
| <b>C</b> | 1.939000 | 4.161000 | -4.361000 | .53660  |
| <b>O</b> | 2.403000 | 3.834000 | -3.272000 | -.58190 |
| <b>H</b> | .490880  | 6.403990 | -6.155220 | .29360  |
| <b>H</b> | .662240  | 5.589200 | -3.441300 | .11050  |
| <b>C</b> | -.489000 | 4.470000 | -4.871000 | .05600  |



|   |           |           |           |         |
|---|-----------|-----------|-----------|---------|
| C | -1.315000 | 3.910000  | -3.725000 | .01360  |
| C | -.537000  | 2.945000  | -2.849000 | .80540  |
| O | .016000   | 1.956000  | -3.391000 | -.81880 |
| O | -.487000  | 3.178000  | -1.614000 | -.81880 |
| H | -.314450  | 3.720260  | -5.641100 | -.01730 |
| H | -1.159730 | 5.222770  | -5.250980 | -.01730 |
| H | -2.210400 | 3.426000  | -4.109320 | -.04250 |
| H | -1.646270 | 4.758730  | -3.123840 | -.04250 |
| N | 1.945000  | -1.516000 | 4.990000  | -.39805 |
| C | 1.831000  | -.073000  | 5.101000  | -.24000 |
| C | 1.950000  | .463000   | 6.511000  | .68395  |
| O | 1.822000  | 1.662000  | 6.713000  | -.63955 |
| H | 1.163730  | -2.051990 | 4.638880  | .22455  |
| H | 2.644290  | .388350   | 4.539990  | .14260  |
| C | .564676   | .466355   | 4.401799  | -.00940 |
| C | .648657   | .206123   | 2.895901  | .01870  |
| C | -.685469  | .394102   | 2.166320  | .00000  |
| C | -.699998  | -.520610  | .935374   |         |
| N | .277826   | -.112738  | -.052912  |         |
| H | .475137   | 1.536559  | 4.543363  | .03620  |
| H | -.332882  | .048285   | 4.835395  | .03620  |
| H | .984300   | -.812850  | 2.743276  | .01030  |
| H | 1.398635  | .865620   | 2.456189  | .01030  |
| H | -.816183  | 1.440756  | 1.880194  | .06210  |
| H | -1.510987 | .105856   | 2.819384  | .06210  |
| H | -1.682769 | -.499085  | .493784   |         |
| H | -.464496  | -1.525445 | 1.237642  |         |
| H | .068630   | .702148   | -.577828  |         |
| C | 1.324954  | -.837932  | -.421331  |         |
| C | 2.145339  | -.533732  | -1.467314 |         |
| C | 3.351023  | -1.268386 | -1.785110 |         |
| C | 4.268442  | -.719332  | -2.619407 |         |
| C | 5.441803  | -1.438319 | -3.147570 |         |
| C | 6.651048  | -1.457771 | -2.509015 |         |
| C | 7.785443  | -2.208176 | -2.928415 |         |
| C | 8.725704  | -2.551179 | -1.927087 |         |
| C | 9.949655  | -3.134306 | -2.153056 |         |
| C | 10.908503 | -3.434755 | -1.084148 |         |
| C | 3.594531  | -2.584484 | -1.075582 |         |
| C | 7.995227  | -2.581872 | -4.374578 |         |
| H | 1.494852  | -1.699014 | .190890   |         |
| H | 1.957686  | .379568   | -1.994026 |         |
| H | 4.066722  | .239969   | -3.049814 |         |
| H | 5.309671  | -1.970131 | -4.085415 |         |
| H | 6.692184  | -.988708  | -1.538064 |         |
| H | 8.446479  | -2.325455 | -.911337  |         |
| H | 10.220685 | -3.435306 | -3.156923 |         |
| H | 3.898308  | -2.400769 | -.048324  |         |
| H | 2.692078  | -3.183886 | -1.039027 |         |
| H | 4.356661  | -3.183825 | -1.546339 |         |
| H | 8.675784  | -1.861888 | -4.825182 |         |
| H | 8.407739  | -3.575980 | -4.494196 |         |
| H | 7.076167  | -2.523870 | -4.942351 |         |
| C | 11.103664 | -2.564415 | -.048797  |         |
| C | 11.994738 | -2.910591 | 1.129409  |         |
| C | 10.501023 | -1.173868 | .049012   |         |
| C | 12.958292 | -4.061280 | .854619   |         |
| H | 12.548355 | -2.026439 | 1.435195  |         |
| H | 11.336927 | -3.152888 | 1.965545  |         |
| C | 12.235337 | -5.200218 | .151328   |         |
| H | 13.800759 | -3.716467 | .263245   |         |

|     |           |           |           |         |
|-----|-----------|-----------|-----------|---------|
| H   | 13.364461 | -4.415615 | 1.798705  |         |
| C   | 11.641317 | -4.792635 | -1.209875 |         |
| H   | 12.911547 | -6.035208 | -.006925  |         |
| H   | 11.435179 | -5.562006 | .795833   |         |
| C   | 12.760508 | -4.710584 | -2.269258 |         |
| C   | 10.645710 | -5.890253 | -1.632161 |         |
| H   | 12.405295 | -4.283228 | -3.205990 |         |
| H   | 13.615245 | -4.135653 | -1.927761 |         |
| H   | 13.120745 | -5.710659 | -2.493852 |         |
| H   | 10.295411 | -5.766254 | -2.652789 |         |
| H   | 11.134000 | -6.858540 | -1.583385 |         |
| H   | 9.782103  | -5.921865 | -.972521  |         |
| H   | 11.255013 | -.493724  | .433252   |         |
| H   | 10.156189 | -.761875  | -.888584  |         |
| H   | 9.671175  | -1.153170 | .752901   |         |
| O   | 1.012854  | -2.073951 | -3.606484 | -.83400 |
| H   | 1.254838  | -1.807542 | -2.687599 | .41700  |
| H   | 1.441511  | -1.296503 | -4.023397 | .41700  |
| O   | -2.063040 | 1.363916  | -.756975  | -.83400 |
| H   | -1.437154 | 2.080545  | -1.039891 | .41700  |
| H   | -2.778515 | 1.496744  | -1.390275 | .41700  |
| HLA | -.685213  | .081315   | 1.733789  |         |

**S<sub>0</sub>-I.** Optimized at the CASSCF/6-31G\*/Amber level of theory with the active space comprising 12 electrons/12 orbitals. The atoms in bold indicate atoms that have been kept frozen during optimization procedure. Atom HLA denotes the hydrogen link atom.

| Atom     | X         | Y         | Z         | Charge  |
|----------|-----------|-----------|-----------|---------|
| <b>N</b> | 1.115000  | 6.262998  | -5.370998 | -.51630 |
| <b>C</b> | .802000   | 5.175998  | -4.439998 | .03970  |
| <b>C</b> | 1.938999  | 4.160999  | -4.360998 | .53660  |
| <b>O</b> | 2.402999  | 3.833999  | -3.271999 | -.58190 |
| <b>H</b> | .490880   | 6.403988  | -6.155218 | .29360  |
| <b>H</b> | .662240   | 5.589198  | -3.441299 | .11050  |
| <b>C</b> | -.489000  | 4.469998  | -4.870998 | .05600  |
| <b>C</b> | -1.315000 | 3.909999  | -3.724999 | .01360  |
| <b>C</b> | -.537000  | 2.944999  | -2.848999 | .80540  |
| <b>O</b> | .016000   | 1.955999  | -3.390999 | -.81880 |
| <b>O</b> | -.487000  | 3.177999  | -1.613999 | -.81880 |
| <b>H</b> | -.314450  | 3.720259  | -5.641098 | -.01730 |
| <b>H</b> | -1.159730 | 5.222768  | -5.250978 | -.01730 |
| <b>H</b> | -2.210399 | 3.425999  | -4.109319 | -.04250 |
| <b>H</b> | -1.646269 | 4.758728  | -3.123839 | -.04250 |
| <b>N</b> | 1.944999  | -1.515999 | 4.989998  | -.39805 |
| <b>C</b> | 1.830999  | -.073000  | 5.100998  | -.24000 |
| <b>C</b> | 1.949999  | .463000   | 6.510998  | .68395  |
| <b>O</b> | 1.821999  | 1.661999  | 6.712998  | -.63955 |
| <b>H</b> | 1.163730  | -2.051989 | 4.638878  | .22455  |
| <b>H</b> | 2.644289  | .388350   | 4.539988  | .14260  |
| C        | .539484   | .471984   | 4.457270  | -.00940 |
| C        | .520355   | .188424   | 2.961083  | .01870  |
| C        | -.830109  | .502556   | 2.308465  | .00000  |
| C        | -.953595  | -.335885  | 1.032723  |         |
| N        | .075275   | .033385   | .050714   |         |
| H        | .477352   | 1.545853  | 4.579954  | .03620  |
| H        | -.338573  | .079379   | 4.953624  | .03620  |
| H        | .736656   | -.861790  | 2.817257  | .01030  |
| H        | 1.308515  | .765898   | 2.474646  | .01030  |

|     |           |           |           |         |
|-----|-----------|-----------|-----------|---------|
| H   | -.910024  | 1.571815  | 2.091159  | .06210  |
| H   | -1.639667 | .220847   | 2.986074  | .06210  |
| H   | -1.931013 | -.195416  | .599051   |         |
| H   | -.804815  | -1.376962 | 1.268191  |         |
| H   | -.032134  | .923706   | -.422019  |         |
| C   | 1.027101  | -.759118  | -.274720  |         |
| C   | 2.104243  | -.436912  | -1.169151 |         |
| C   | 3.055617  | -1.379914 | -1.433508 |         |
| C   | 4.398058  | -.963092  | -1.825783 |         |
| C   | 5.385307  | -1.817328 | -2.170898 |         |
| C   | 6.802155  | -1.625020 | -1.880676 |         |
| C   | 7.828852  | -2.308726 | -2.451678 |         |
| C   | 9.016268  | -2.521422 | -1.621410 |         |
| C   | 10.179184 | -3.095270 | -1.984819 |         |
| C   | 11.159879 | -3.630059 | -1.003859 |         |
| C   | 2.829408  | -2.851460 | -1.148505 |         |
| C   | 7.728559  | -2.976646 | -3.800131 |         |
| H   | 1.038936  | -1.695927 | .250558   |         |
| H   | 2.227625  | .588721   | -1.471359 |         |
| H   | 4.650751  | .062051   | -1.636729 |         |
| H   | 5.104302  | -2.833001 | -2.399382 |         |
| H   | 6.999301  | -1.088144 | -.967222  |         |
| H   | 8.849898  | -2.341065 | -.576788  |         |
| H   | 10.360423 | -3.317201 | -3.021187 |         |
| H   | 3.318777  | -3.144675 | -.223280  |         |
| H   | 1.781809  | -3.111544 | -1.080891 |         |
| H   | 3.241535  | -3.460137 | -1.943111 |         |
| H   | 8.584028  | -2.705496 | -4.412080 |         |
| H   | 7.727502  | -4.067673 | -3.725996 |         |
| H   | 6.842773  | -2.645228 | -4.340806 |         |
| C   | 11.501366 | -2.984156 | .138420   |         |
| C   | 12.398558 | -3.605842 | 1.183451  |         |
| C   | 11.041028 | -1.594627 | .527450   |         |
| C   | 13.154333 | -4.840054 | .713302   |         |
| H   | 13.106622 | -2.857284 | 1.528809  |         |
| H   | 11.772090 | -3.853594 | 2.042505  |         |
| C   | 12.228750 | -5.733438 | -.096725  |         |
| H   | 14.018255 | -4.545711 | .126601   |         |
| H   | 13.527018 | -5.379108 | 1.583558  |         |
| C   | 11.701033 | -5.031505 | -1.358073 |         |
| H   | 12.732876 | -6.651295 | -.386664  |         |
| H   | 11.382488 | -6.027095 | .524446   |         |
| C   | 12.826747 | -4.889109 | -2.398187 |         |
| C   | 10.589805 | -5.925689 | -1.944911 |         |
| H   | 12.460957 | -4.402801 | -3.298211 |         |
| H   | 13.663947 | -4.319213 | -2.016071 |         |
| H   | 13.197776 | -5.867717 | -2.693264 |         |
| H   | 10.248516 | -5.587778 | -2.916761 |         |
| H   | 10.964439 | -6.936894 | -2.071609 |         |
| H   | 9.729254  | -5.967475 | -1.282127 |         |
| H   | 11.867507 | -1.061565 | .991518   |         |
| H   | 10.681031 | -1.001935 | -.304494  |         |
| H   | 10.245617 | -1.644651 | 1.269034  |         |
| O   | 1.026243  | -2.066489 | -3.677869 | -.83400 |
| H   | 1.569460  | -1.872960 | -2.900609 | .41700  |
| H   | 1.217461  | -1.241975 | -4.179501 | .41700  |
| O   | -2.158805 | 1.333173  | -.920688  | -.83400 |
| H   | -1.565453 | 2.090237  | -1.179010 | .41700  |
| H   | -2.944214 | 1.535494  | -1.456178 | .41700  |
| HLA | -.865198  | .214455   | 1.862970  |         |

**S<sub>0</sub>-PSB11 +Cl<sup>-</sup>**. Optimized at the CASSCF/6-31G\*/Amber level of theory with the active space comprising 12 electrons/12 orbitals.

| Atom | X         | Y         | Z         | Charge   |
|------|-----------|-----------|-----------|----------|
| C    | -6.523390 | .894472   | .637573   |          |
| H    | -7.329653 | 1.123109  | 1.328226  |          |
| H    | -5.693408 | 1.544258  | .892303   |          |
| H    | -6.857843 | 1.145143  | -.365714  |          |
| C    | -6.155413 | -.599337  | .744407   |          |
| C    | -5.533412 | -.839162  | 2.135085  |          |
| H    | -4.601626 | -.293392  | 2.244317  |          |
| H    | -6.204115 | -.499814  | 2.919850  |          |
| H    | -5.316454 | -1.891108 | 2.300475  |          |
| C    | -7.461123 | -1.404344 | .594792   |          |
| H    | -8.065209 | -1.268111 | 1.488677  |          |
| H    | -8.038119 | -.993132  | -.231299  |          |
| C    | -7.223651 | -2.885512 | .328706   |          |
| H    | -6.659129 | -3.330592 | 1.146178  |          |
| H    | -8.174069 | -3.409659 | .278392   |          |
| C    | -6.452075 | -3.050712 | -.976375  |          |
| H    | -6.084130 | -4.071491 | -1.074621 |          |
| H    | -7.125709 | -2.899553 | -1.819997 |          |
| C    | -5.283121 | -2.093980 | -1.123024 |          |
| C    | -4.351608 | -2.470929 | -2.255224 |          |
| H    | -3.673733 | -1.676986 | -2.533868 |          |
| H    | -3.757397 | -3.345102 | -1.992947 |          |
| H    | -4.929955 | -2.742348 | -3.134614 |          |
| C    | -5.140127 | -.993430  | -.349200  |          |
| C    | -3.986217 | -.057584  | -.506379  |          |
| H    | -4.241122 | .947116   | -.795152  |          |
| C    | -2.687853 | -.356969  | -.285591  |          |
| H    | -2.430420 | -1.363214 | .007588   |          |
| C    | -1.564744 | .588439   | -.417564  |          |
| C    | -1.901259 | 2.023896  | -.754092  |          |
| H    | -2.595160 | 2.427292  | -.022824  |          |
| H    | -1.040195 | 2.673584  | -.776040  |          |
| H    | -2.382555 | 2.079289  | -1.726074 |          |
| C    | -.295748  | .122582   | -.239482  |          |
| H    | -.190947  | -.921882  | -.014912  |          |
| C    | .909241   | .927138   | -.375949  |          |
| H    | .752698   | 1.966557  | -.591337  |          |
| C    | 2.230236  | .607341   | -.303982  |          |
| H    | 2.895902  | 1.428458  | -.503579  |          |
| C    | 2.947088  | -.632735  | -.006122  |          |
| C    | 2.211003  | -1.873667 | .449488   |          |
| H    | 2.867982  | -2.680595 | .749885   |          |
| H    | 1.565171  | -1.640843 | 1.288554  |          |
| H    | 1.588427  | -2.247238 | -.358976  |          |
| C    | 4.303383  | -.563521  | -.173800  |          |
| H    | 4.750730  | .335740   | -.566920  |          |
| C    | 5.230550  | -1.600549 | .137954   |          |
| H    | 4.909575  | -2.521719 | .592830   |          |
| N    | 6.492661  | -1.482161 | -.069430  |          |
| H    | 6.813431  | -.642680  | -.537757  |          |
| C    | 7.468210  | -2.518354 | .285227   |          |
| H    | 8.442484  | -2.060186 | .367251   |          |
| H    | 7.198637  | -2.967916 | 1.231423  |          |
| H    | 7.504496  | -3.276049 | -.487556  |          |
| Cl   | 6.865664  | .978668   | -2.026682 | -1.00000 |

**S<sub>1</sub>-PSB11 +Cl<sup>-</sup>**. Optimized at the CASSCF/6-31G\*/Amber level of theory with the active space comprising 12 electrons/12 orbitals.

| Atom | X         | Y         | Z         | Charge   |
|------|-----------|-----------|-----------|----------|
| C    | -6.707572 | 1.201626  | .769180   |          |
| H    | -7.488240 | 1.400960  | 1.496797  |          |
| H    | -5.880409 | 1.862641  | 1.002158  |          |
| H    | -7.086144 | 1.467180  | -.214728  |          |
| C    | -6.304395 | -.284787  | .824699   |          |
| C    | -5.621546 | -.545828  | 2.182254  |          |
| H    | -4.694582 | .010775   | 2.266104  |          |
| H    | -6.262065 | -.235167  | 3.002432  |          |
| H    | -5.383035 | -1.597388 | 2.311987  |          |
| C    | -7.594002 | -1.119437 | .706157   |          |
| H    | -8.155721 | -1.033231 | 1.633134  |          |
| H    | -8.219991 | -.696661  | -.076204  |          |
| C    | -7.331440 | -2.581407 | .369402   |          |
| H    | -6.710295 | -3.040231 | 1.136055  |          |
| H    | -8.267042 | -3.132424 | .347999   |          |
| C    | -6.628710 | -2.671436 | -.980174  |          |
| H    | -6.244189 | -3.677203 | -1.141669 |          |
| H    | -7.349105 | -2.500672 | -1.779640 |          |
| C    | -5.489204 | -1.683828 | -1.139010 |          |
| C    | -4.599687 | -1.987738 | -2.324123 |          |
| H    | -3.948453 | -1.168379 | -2.590270 |          |
| H    | -3.980367 | -2.861444 | -2.130653 |          |
| H    | -5.210169 | -2.226257 | -3.190929 |          |
| C    | -5.328417 | -.619578  | -.319347  |          |
| C    | -4.180308 | .324066   | -.474457  |          |
| H    | -4.429756 | 1.329511  | -.764536  |          |
| C    | -2.888902 | .013732   | -.239073  |          |
| H    | -2.653684 | -.996788  | .055833   |          |
| C    | -1.743303 | .931074   | -.364234  |          |
| C    | -2.038665 | 2.378065  | -.690433  |          |
| H    | -2.763890 | 2.778084  | .010409   |          |
| H    | -1.166202 | 3.011959  | -.648653  |          |
| H    | -2.466953 | 2.463228  | -1.684559 |          |
| C    | -.488867  | .426109   | -.189573  |          |
| H    | -.419079  | -.621022  | .036394   |          |
| C    | .746473   | 1.178307  | -.356132  |          |
| H    | .632587   | 2.198496  | -.667778  |          |
| C    | 2.050175  | .812400   | -.221985  |          |
| H    | 2.756145  | 1.576900  | -.495814  |          |
| C    | 2.697493  | -.426184  | .224993   |          |
| C    | 1.908344  | -1.505731 | .926139   |          |
| H    | 2.540370  | -2.230768 | 1.423179  |          |
| H    | 1.256666  | -1.067406 | 1.670936  |          |
| H    | 1.291002  | -2.045170 | .216716   |          |
| C    | 4.037811  | -.505185  | -.015053  |          |
| H    | 4.526110  | .290652   | -.553111  |          |
| C    | 4.906016  | -1.586277 | .369829   |          |
| H    | 4.571436  | -2.411450 | .968400   |          |
| N    | 6.145369  | -1.597473 | .018876   |          |
| H    | 6.454796  | -.826691  | -.570962  |          |
| C    | 7.142843  | -2.609060 | .366661   |          |
| H    | 7.942725  | -2.129920 | .911138   |          |
| H    | 6.693006  | -3.377364 | .977124   |          |
| H    | 7.537569  | -3.029967 | -.545359  |          |
| Cl   | 6.592030  | .813378   | -2.106973 | -1.00000 |

## 5. Excited-State Gradient

Excited-state ( $S_1$ ) cartesian forces for the **PSB11** in **S<sub>0</sub>-Rh**-optimized structure (see above). The forces are computed at the single root CASSCF/6-31G\*/Amber level with a 12 electrons/12 orbitals active space. The Cartesian coordinates of the relevant fragment (Å) are also given.

Cartesian Coordinates of the Fragment

| Atom | X         | Y         | Z         |
|------|-----------|-----------|-----------|
| C    | -.708968  | -.461944  | .943648   |
| N    | .291210   | -.059143  | -.057086  |
| H    | -1.683488 | -.416855  | .485487   |
| H    | -.483060  | -1.472114 | 1.241346  |
| H    | .072029   | .761400   | -.609640  |
| C    | 1.350744  | -.740551  | -.312793  |
| C    | 2.261938  | -.426553  | -1.383077 |
| C    | 3.409522  | -1.137401 | -1.614307 |
| C    | 4.226937  | -.717263  | -2.758500 |
| C    | 5.501593  | -1.060244 | -3.082862 |
| C    | 6.488897  | -1.815909 | -2.311867 |
| C    | 7.644302  | -2.341877 | -2.801413 |
| C    | 8.620835  | -2.867257 | -1.833984 |
| C    | 9.884947  | -3.253504 | -2.108414 |
| C    | 10.867027 | -3.698740 | -1.077738 |
| C    | 3.817233  | -2.327584 | -.768648  |
| C    | 7.991565  | -2.385426 | -4.269794 |
| H    | 1.507712  | -1.588868 | .327671   |
| H    | 2.022008  | .432939   | -1.991398 |
| H    | 3.735651  | -.035300  | -3.432174 |
| H    | 5.869230  | -.620176  | -3.991390 |
| H    | 6.352824  | -1.861952 | -1.248001 |
| H    | 8.298926  | -2.874170 | -.805891  |
| H    | 10.218396 | -3.280674 | -3.132515 |
| H    | 4.511171  | -2.023172 | .006920   |
| H    | 2.980531  | -2.807926 | -.280945  |
| H    | 4.303004  | -3.078338 | -1.373993 |
| H    | 8.848604  | -1.758557 | -4.486209 |
| H    | 8.238350  | -3.398579 | -4.572195 |
| H    | 7.179480  | -2.037786 | -4.893307 |
| C    | 11.168708 | -2.940210 | .005408   |
| C    | 12.112710 | -3.411058 | 1.095387  |
| C    | 10.572190 | -1.576746 | .294799   |
| C    | 12.971140 | -4.610722 | .707356   |
| H    | 12.754464 | -2.584176 | 1.388436  |
| H    | 11.507147 | -3.645675 | 1.971969  |
| C    | 12.123882 | -5.631464 | -.039153  |
| H    | 13.812886 | -4.290319 | .102836   |
| H    | 13.385472 | -5.060778 | 1.607585  |
| C    | 11.532018 | -5.065845 | -1.341825 |
| H    | 12.707358 | -6.517567 | -.273729  |
| H    | 11.309031 | -5.957637 | .606632   |
| C    | 12.644310 | -4.909884 | -2.396356 |
| C    | 10.494740 | -6.077888 | -1.863311 |
| H    | 12.251256 | -4.497879 | -3.322959 |
| H    | 13.453490 | -4.276500 | -2.051512 |
| H    | 13.071030 | -5.881054 | -2.633373 |
| H    | 10.107298 | -5.805704 | -2.839668 |

|   |           |           |           |
|---|-----------|-----------|-----------|
| H | 10.950892 | -7.058984 | -1.956257 |
| H | 9.652096  | -6.164023 | -1.181586 |
| H | 11.346294 | -.915013  | .677607   |
| H | 10.125919 | -1.105259 | -.569708  |
| H | 9.808473  | -1.647207 | 1.066035  |

Cartesian Forces (a.u.)

| Atom | X           | Y           | Z           |
|------|-------------|-------------|-------------|
| C    | .006722162  | -.038202528 | -.071552617 |
| N    | -.056316193 | .037123194  | .013864271  |
| H    | -.002119000 | -.002404883 | .003182531  |
| H    | -.001519193 | -.000439069 | .000677350  |
| H    | .000144628  | -.007693712 | .005948508  |
| C    | .062789804  | -.023937913 | -.032886462 |
| C    | -.042627676 | .003238460  | .032163630  |
| C    | .031133581  | -.016366003 | -.023096023 |
| C    | -.026663235 | .001621925  | .023894797  |
| C    | .038657892  | -.012472691 | -.004675930 |
| C    | -.048659143 | .031253866  | .007716354  |
| C    | .063020456  | -.026514482 | -.000882427 |
| C    | -.049714364 | .024338827  | -.007956440 |
| C    | .031313916  | -.011089051 | -.000954494 |
| C    | -.006324966 | -.001717168 | -.007037974 |
| C    | .000448095  | .005098580  | -.001124910 |
| C    | -.002883748 | -.000764509 | -.002018084 |
| H    | .001841468  | .001664862  | -.000364578 |
| H    | .000328426  | -.000025724 | .000117207  |
| H    | .001733188  | .000521706  | -.000705726 |
| H    | .001827130  | -.003383131 | -.001314139 |
| H    | -.002499786 | -.004092210 | -.000531945 |
| H    | .000426723  | .000079040  | -.000407246 |
| H    | -.001113252 | -.002124847 | .000211259  |
| H    | -.000096653 | -.001621466 | .003881956  |
| H    | .000644184  | .000617066  | -.000901908 |
| H    | .000537633  | -.003285041 | -.000517068 |
| H    | -.000739986 | .000776721  | .000434904  |
| H    | .000041076  | .000186116  | .000583246  |
| H    | .001051345  | -.000209279 | .001799923  |
| C    | -.003257873 | .003560058  | .007673584  |
| C    | .002108085  | -.000303332 | -.000422810 |
| C    | .000259215  | -.000092225 | -.000302252 |
| C    | .001075980  | -.000663028 | -.000301999 |
| H    | -.000741538 | -.000055120 | -.000508725 |
| H    | -.001061372 | .000532372  | -.001190673 |
| C    | -.001383026 | .000461645  | .002426789  |
| H    | .000035919  | .000194049  | .000055292  |
| H    | -.000591862 | .000511514  | -.000623251 |
| C    | .003229700  | -.001790842 | -.004489242 |
| H    | -.000383234 | .000883876  | -.000840370 |
| H    | .000180649  | .000063724  | -.000180726 |
| C    | .000259013  | -.000139820 | .000299205  |
| C    | -.000324384 | .000292371  | .001275811  |
| H    | .000306627  | .000140792  | -.000497579 |
| H    | .000201064  | -.000075309 | -.000101587 |
| H    | -.000530147 | .000664145  | -.000049460 |
| H    | -.000051329 | -.000297574 | -.001187122 |
| H    | -.000622004 | .000778730  | -.000223906 |
| H    | -.000028015 | -.000477506 | .000094866  |
| H    | -.001024872 | -.000411422 | -.000902526 |

|   |            |             |             |
|---|------------|-------------|-------------|
| H | .000031119 | .001219808  | -.000075753 |
| H | .000597571 | -.000461519 | .000367837  |

Excited state ( $S_1$ ) cartesian forces for the **PSB11** in **S<sub>0</sub>-PSB11+Cl<sup>-</sup>** optimized structure (see above). The forces are computed at the single root CASSCF/6-31G\*/Amber level with a 12 electrons/12 orbitals active space. The Cartesian coordinates of the relevant fragment (**Å**) are also given.

Cartesian Coordinates of the Fragment

| Atom | X         | Y         | Z         |
|------|-----------|-----------|-----------|
| C    | -6.523390 | .894472   | .637573   |
| H    | -7.329653 | 1.123109  | 1.328226  |
| H    | -5.693408 | 1.544258  | .892303   |
| H    | -6.857843 | 1.145143  | -.365714  |
| C    | -6.155413 | -.599337  | .744407   |
| C    | -5.533412 | -.839162  | 2.135085  |
| H    | -4.601626 | -.293392  | 2.244317  |
| H    | -6.204115 | -.499814  | 2.919850  |
| H    | -5.316454 | -1.891108 | 2.300475  |
| C    | -7.461123 | -1.404344 | .594792   |
| H    | -8.065209 | -1.268111 | 1.488677  |
| H    | -8.038119 | -.993132  | -.231299  |
| C    | -7.223651 | -2.885512 | .328706   |
| H    | -6.659129 | -3.330592 | 1.146178  |
| H    | -8.174069 | -3.409659 | .278392   |
| C    | -6.452075 | -3.050712 | -.976375  |
| H    | -6.084130 | -4.071491 | -1.074621 |
| H    | -7.125709 | -2.899553 | -1.819997 |
| C    | -5.283121 | -2.093980 | -1.123024 |
| C    | -4.351608 | -2.470929 | -2.255224 |
| H    | -3.673733 | -1.676986 | -2.533868 |
| H    | -3.757397 | -3.345102 | -1.992947 |
| H    | -4.929955 | -2.742348 | -3.134614 |
| C    | -5.140127 | -.993430  | -.349200  |
| C    | -3.986217 | -.057584  | -.506379  |
| H    | -4.241122 | .947116   | -.795152  |
| C    | -2.687853 | -.356969  | -.285591  |
| H    | -2.430420 | -1.363214 | .007588   |
| C    | -1.564744 | .588439   | -.417564  |
| C    | -1.901259 | 2.023896  | -.754092  |
| H    | -2.595160 | 2.427292  | -.022824  |
| H    | -1.040195 | 2.673584  | -.776040  |
| H    | -2.382555 | 2.079289  | -1.726074 |
| C    | -.295748  | .122582   | -.239482  |
| H    | -.190947  | -.921882  | -.014912  |
| C    | .909241   | .927138   | -.375949  |
| H    | .752698   | 1.966557  | -.591337  |
| C    | 2.230236  | .607341   | -.303982  |
| H    | 2.895902  | 1.428458  | -.503579  |
| C    | 2.947088  | -.632735  | -.006122  |
| C    | 2.211003  | -1.873667 | .449488   |
| H    | 2.867982  | -2.680595 | .749885   |
| H    | 1.565171  | -1.640843 | 1.288554  |
| H    | 1.588427  | -2.247238 | -.358976  |
| C    | 4.303383  | -.563521  | -.173800  |
| H    | 4.750730  | .335740   | -.566920  |
| C    | 5.230550  | -1.600549 | .137954   |
| H    | 4.909575  | -2.521719 | .592830   |



|   |          |           |          |
|---|----------|-----------|----------|
| N | 6.492661 | -1.482161 | -.069430 |
| H | 6.813431 | -.642680  | -.537757 |
| C | 7.468210 | -2.518354 | .285227  |
| H | 8.442484 | -2.060186 | .367251  |
| H | 7.198637 | -2.967916 | 1.231423 |
| H | 7.504496 | -3.276049 | -.487556 |

Cartesian forces (a.u.)

| Atom | X            | Y            | Z            |
|------|--------------|--------------|--------------|
| C    | 0.000544625  | -0.000494971 | -0.000491127 |
| H    | 0.000483584  | 0.000032847  | -0.000225581 |
| H    | -0.000545558 | 0.000571005  | 0.000525737  |
| H    | -0.000380198 | 0.000100022  | 0.000207056  |
| C    | -0.001317448 | 0.002142078  | 0.000770719  |
| C    | 0.000591065  | -0.000432851 | -0.000692829 |
| H    | -0.000471918 | -0.000009044 | 0.001055359  |
| H    | 0.000477382  | -0.000028791 | -0.000288039 |
| H    | -0.000253161 | 0.000635798  | 0.000110698  |
| C    | 0.000155241  | -0.000229815 | -0.000581247 |
| H    | 0.000554461  | 0.000098966  | -0.000322238 |
| H    | -0.000003901 | -0.000141944 | 0.000395638  |
| C    | 0.000377951  | 0.000279329  | 0.000167761  |
| H    | -0.000450965 | 0.000104393  | -0.000243056 |
| H    | 0.000504991  | 0.000235586  | -0.000074313 |
| C    | -0.000875144 | -0.000231380 | 0.000421271  |
| H    | 0.000076439  | 0.000690604  | -0.000059218 |
| H    | 0.000391911  | 0.000103621  | 0.000125001  |
| C    | 0.001175952  | -0.001870754 | -0.000935959 |
| C    | 0.001089636  | 0.000396969  | 0.000748124  |
| H    | -0.000072506 | -0.000548811 | -0.001136069 |
| H    | -0.000553678 | 0.000228670  | -0.000064149 |
| H    | 0.000213292  | 0.000309711  | 0.000075785  |
| C    | 0.001086855  | 0.000932887  | 0.001769339  |
| C    | -0.021285826 | 0.003053680  | -0.003788143 |
| H    | -0.000614578 | 0.001489891  | 0.000637563  |
| C    | 0.041373312  | 0.006845884  | 0.001158045  |
| H    | 0.000090629  | -0.000488499 | -0.000157784 |
| C    | -0.064278930 | 0.002069993  | -0.004406074 |
| C    | -0.000185211 | 0.002162680  | -0.000347183 |
| H    | 0.000696384  | -0.000016512 | -0.000104541 |
| H    | -0.000218794 | 0.000314676  | 0.000052263  |
| H    | 0.000841740  | 0.000110222  | -0.000052556 |
| C    | 0.067695213  | 0.002602414  | 0.001873702  |
| H    | 0.001721812  | -0.003315582 | 0.000986272  |
| C    | -0.061509941 | 0.004517325  | -0.001280303 |
| H    | -0.001188143 | -0.000393278 | 0.000274091  |
| C    | 0.038035266  | -0.031915691 | 0.006355849  |
| H    | 0.001425557  | 0.002476085  | -0.001401405 |
| C    | -0.037644292 | 0.010760829  | 0.001823067  |
| C    | -0.002193669 | 0.005914985  | -0.004318737 |
| H    | 0.000008339  | 0.003031556  | -0.000726260 |
| H    | 0.000701223  | -0.001699825 | 0.000696120  |
| H    | 0.001207898  | -0.002196571 | 0.002160043  |
| C    | 0.029232594  | -0.010615173 | 0.002880794  |
| H    | -0.000329787 | -0.002462626 | 0.000647837  |
| C    | -0.052123468 | -0.005387329 | 0.008368773  |
| H    | 0.001920883  | 0.007896044  | -0.004264121 |
| N    | 0.062343932  | 0.009699714  | -0.008679652 |
| H    | -0.003475448 | -0.011919572 | 0.004757231  |

|   |              |              |              |
|---|--------------|--------------|--------------|
| C | -0.007662533 | 0.009998713  | -0.004503925 |
| H | -0.001649678 | -0.000763954 | 0.000227091  |
| H | 0.000110171  | 0.000003448  | -0.000810271 |
| H | 0.000901211  | -0.000612455 | 0.001178051  |

Table 3. Energies relative to  $S_0$  in kcal · mol<sup>-1</sup>

| Structure                                                                | $S_1$  |        | $S_2$  |        |
|--------------------------------------------------------------------------|--------|--------|--------|--------|
|                                                                          | CASSCF | CASPT2 | CASSCF | CASPT2 |
| <b><math>S_0</math>-PSB11 +Cl<sup>-</sup></b><br>(in CH <sub>3</sub> OH) | 95.30  | 67.27  | 108.05 | 83.49  |
| <b><math>S_1</math>-PSB11 +Cl<sup>-</sup></b><br>(in CH <sub>3</sub> OH) | 53.70  | 42.86  | 70.62  | 49.15  |
| <b>PSB11</b>                                                             | 87.71  | 62.83  | 104.56 | 87.38  |
| <b>PSB11+Glu113</b>                                                      | 99.17  | 80.24  | 113.23 | 80.78  |
| <b><math>S_0</math>-Rh</b>                                               | 91.91  | 59.72  | 109.23 | 87.23  |
| <b><math>S_1</math>-Rh</b>                                               | 48.56  | 37.29  | 66.94  | 51.30  |
| <b><math>S_1</math>-Rh<sub>stretch</sub></b>                             | 75.53  | 49.58  | 81.69  | 67.87  |
| <b>Rh-Cl</b>                                                             | 19.50  | 1.63   | 59.49  | 51.83  |
| <b>So-I</b>                                                              | 91.05  | 57.06  | 107.40 | 82.98  |

Table 4. Charge-transfer ( $\Delta q$ ), change in dipole moments ( $\Delta\mu$ ) and oscillator strengths ( $f$ )

| Structure                                                                | $\Delta q^a$          |                       | $\Delta\mu$ (Debye) <sup>b</sup> |                       | $f^c$                 |                       |
|--------------------------------------------------------------------------|-----------------------|-----------------------|----------------------------------|-----------------------|-----------------------|-----------------------|
|                                                                          | $S_0 \rightarrow S_1$ | $S_0 \rightarrow S_2$ | $S_0 \rightarrow S_1$            | $S_0 \rightarrow S_2$ | $S_0 \rightarrow S_1$ | $S_0 \rightarrow S_2$ |
| <b><math>S_0</math>-PSB11 +Cl<sup>-</sup></b><br>(in CH <sub>3</sub> OH) | -0.212                | -0.197                | 5.56                             | 3.35                  | 0.417                 | 0.604                 |
| <b><math>S_1</math>-PSB11 +Cl<sup>-</sup></b><br>(in CH <sub>3</sub> OH) | -0.169                | -0.273                | 3.41                             | 8.51                  | 0.318                 | 0.654                 |
| <b>PSB11</b>                                                             | -0.370                | -0.178                | 14.17                            | 3.59                  | 0.768                 | 0.316                 |
| <b>PSB11+Glu113</b>                                                      | -0.187                | -0.323                | 3.67                             | 7.41                  | 0.127                 | 0.862                 |
| <b><math>S_0</math>-Rh</b>                                               | -0.343                | -0.144                | 11.13                            | 3.06                  | 0.506                 | 0.401                 |
| <b><math>S_1</math>-Rh</b>                                               | -0.272                | -0.085                | 8.18                             | 3.70                  | 0.590                 | 0.430                 |
| <b><math>S_1</math>-Rh<sub>stretch</sub></b>                             | -0.346                | -0.082                | 11.69                            | 1.66                  | 0.700                 | 0.293                 |
| <b>Rh-Cl</b>                                                             | -0.962                | -0.002                | 22.74                            | 0.01                  | 0.0004                | 0.0006                |
| <b>So-I</b>                                                              | -0.341                | -0.176                | 10.89                            | 3.88                  | 0.426                 | 0.447                 |

- (a) The magnitude of charge transfer induced by the vertical transition is evaluated as the change in the positive charge of the -NH=C<sub>15</sub>- fragment. We use Mulliken charges as we only need to characterize the electronic transition and not to accurately fit point charges. Mulliken charges are calculated by using the CASPT2 functions.
- (b) Dipoles are calculated by using first-order perturbed CASPT2 functions.
- (c) Oscillator strengths are calculated by using CASPT2 energies and CASSCF functions.

1. Kollman, P., Dixon, R., Cornell, W., Fox, T., Chipot, C. & Pohorille, A. (1997) in *Computer Simulation of Biomolecular Systems: Theoretical and Experimental Applications*, eds. van Gunsteren, W. F., Weiner, P. K. & Wilkinson, A.J. (Escom, The Netherlands), pp. 83-96.

2. Ferré, N. & Olivucci, M. (2003) *J. Mol. Struct. (Theochem)* **632**, 71-82.

3. Ferré, N., Cembran, A., Garavelli, M. & Olivucci, M. (2004) *Theor.Chem.Acc.* **112**, 335- .
4. Teller, D. C., Okada, T., Behnke, C. A., Palczewski, K. & Stenkamp, R. E. (2001) *Biochemistry* **40**, 7761-.
5. Zhukovsky, E. A. & Oprian, D. D. (1989) *Science* **246**, 928-930.
6. Fahmy, K., Jager, F., Beck, M., Zvyaga, T. A., Sakmar, T. P. & Siebert, F. (1993) *Proc. Natl. Acad. Sci. USA* **90**, 10206-10210.
7. Kandori, H., Schichida, Y. & Yoshisawa, T. (2001) *Biochemistry (Moscow)* **66**, 1197-1209.
8. Case, D.A., Pearlman, D.A., Caldwell, J.W., Cheatham, T.E. III, Wang, J., Ross, W.S., Simmerling, C.L., Darden, T.A., Merz, K.M., Stanton, R.V. *et al.* (2002) AMBER 7 (University of California, San Francisco).
